# Supplementary material
Source: MDPI journal article supplement (https://www.mdpi.com/2072-4292/8/7/542)
Supplement: s1 [file s1]

# Supplementary Materials: Remote Sensing Measures Restoration Successes, but Canopy Heights Lag in Restoring Floodplain Vegetation

Samantha K. Dawson, Adrian Fisher, Richard Lucas, David K. Hutchinson, Peter Berney, David Keith, Jane A. Catford and Richard T. Kingsford

**Table S1.** A list of all the image dates used in each period of the analysis.

| Pre-Development | Peak-Development | Post-Development |
|-----------------|------------------|------------------|
| 26 March 1988   | 7 April 2004     | 26 March 2011    |
| 11 April 1988   | 23 April 2004    | 11 April 2011    |
| 13 May 1988     | 9 May 2004       | 27 April 2011    |
| 29 May 1988     | 10 June 2004     | 13 May 2011      |
| 20 April 1991   | 26 June 2004     | 17 April 2013    |
| 6 May 1991      | 9 March 2005     | 4 June 2013      |
| 21 March 1992   | 25 March 2005    | 20 April 2014    |
| 22 April 1992   | 26 April 2005    | 22 May 2014      |
| 25 June 1992    | 12 May 2005      | 7 June 2014      |
| 25 April 1993   | 28 May 2005      | 23 April 2015    |
| 11 May 1993     | 15 May 2006      |                  |
| 12 June 1993    | 31 May 2006      |                  |
| 28 June 1993    | 16 June 2006     |                  |
| 11 March 1994   | 2 May 2007       |                  |
| 28 April 1994   |                  |                  |
| 14 May 1994     |                  |                  |
| 30 May 1994     |                  |                  |
| 15 June 1994    |                  |                  |
| 14 March 1995   |                  |                  |
| 30 March 1995   |                  |                  |
| 15 April 1995   |                  |                  |
| 16 March 1996   |                  |                  |
| 1 April 1996    |                  |                  |
| 17 April 1996   |                  |                  |
| 19 May 1996     |                  |                  |

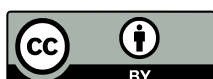

© 2016 by the authors; licensee MDPI, Basel, Switzerland. This article is an open access article distributed under the terms and conditions of the Creative Commons Attribution (CC-BY) license (<http://creativecommons.org/licenses/by/4.0/>).
